# Supplementary material for: Evaluation of 186WS2 target material for production of high specific activity 186Re via proton irradiation: separation, radiolabeling and recovery/recycling
Source: publisher site journal article supplement (doi:10.1515/ract-2021-1138), 2022-04-21
Supplement: Supplementary file 1 [file j_ract-2021-1138_suppl.docx]

**Supplementary Materials**

**Evaluation of 186WS2 target material for production of no carrier added 186Re via proton irradiation: Separation, radiolabeling and recovery/recycling**

Anster Charles1, Firouzeh Najafi Khosrashahi1, Li Ma1, Chathurya Munindradasa1, Rebecca Hoerres1, John D. Lydon2, Steven P. Kelley1, James Guthrie2, David Rotsch3, Dmitri Medvedev4, Cathy S. Cutler4, Yawen Li35, D. Scott Wilbur5, Heather M. Hennkens1,2, Silvia S. Jurisson1*

1Department of Chemistry, University of Missouri, Columbia, MO, USA, 2University of Missouri Research Reactor Center (MURR), Columbia, MO, USA, 3Argonne National Laboratory, Lemont, IL, USA, 4Brookhaven National Laboratory, Upton, NY, USA, 5Department of Radiation Oncology, University of Washington, Seattle, WA, USA

**Table of Contents**

**Figure S1**. 1H NMR of 2-(tritylthio)ethyl-1-amine hydrochloride(**1**)in CD2Cl2 (500 MHz, calibrated to residual CHDCl2 at 5.32 ppm)

**Figure S2**. 1H NMR of N-(2-(tritylthio)ethyl)-2-((2-(tritylthio)ethyl)amino)acetamide (**2**)in CDCl3 (500 MHz, calibrated at 7.26 ppm)

**Figure S3**. 13C NMR of N-(2-(tritylthio)ethyl)-2-((2-(tritylthio)ethyl)amino)acetamide(**2**) in CDCl3 (500 MHz, calibrated at 77.36 ppm)

**Figure S4**. 1H NMR of ethyl 3-((2-oxo-2-((2-(tritylthio)ethyl)amino)ethyl)(2-(tritylthio)ethyl)amino)propionate [trityl protected 222-MAMA-*N*-ethylpropionate] (**3**) in CD2Cl2 **(**500 MHz calibrated at 5.35 ppm)

**Figure S5**. 13C NMR of ethyl 3-((2-oxo-2-((2-(tritylthio)ethyl)amino)ethyl)(2-(tritylthio)ethyl)amino)propionate [trityl protected 222-MAMA-*N*-ethylpropionate](**3**)in CD2Cl2 (500 MHz calibrated at 53.5 ppm)

**Figure S6**.1H NMR of ethyl 3-((2-mercaptoethyl)(2-((2-mercaptoethyl)amino)-2-oxoethyl)amino)propionate (**4**) in CD2Cl2 (600 MHz calibrated at 5.32 ppm)

**Figure S7**.1H NMR of natReO(222-MAMA-*N*-ethylpropionate) (**5**) in CD2Cl2 (600 MHz calibrated at 5.32 ppm)

**Figure S8**.13C NMR ofnatReO(222-MAMA-*N*-ethylproprionate) (**5**) in CD2Cl2 (600 MHz calibrated at 53.5 ppm)

**Figure S9**. ESI-HR-MS of ReO(222-MAMA-*N*-ethylpropionate) (**5**)

**Figure S10**. Drawing of aluminum target backing used to contain graphite sandwiched 186WS2 for cyclotron irradiations.

**Figure S11**. Photograph of aluminum target backing used to contain graphite sandwiched 186WS2 for cyclotron irradiations.

**Figure S12**. HPGe spectrum of dissolved target aliquot before purification

**Figure S13**. HPGe spectrum of purified 186Re aliquot

**Table S1**. ICP-MS results for the purchased 186WO3, the synthesized 186WS2, the recovered 186W, and the separated 186Re


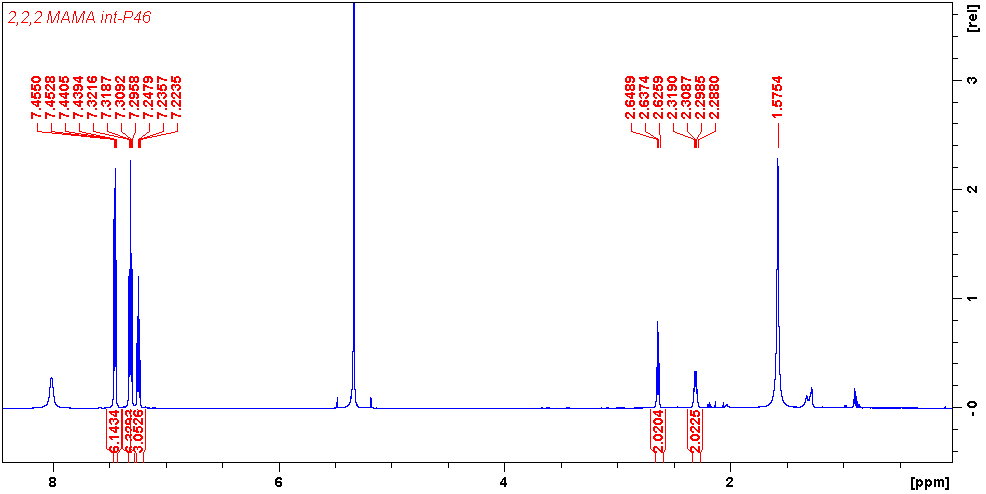


**Figure S1**. 1H NMR of 2-(tritylthio)ethyl-1-amine hydrochloride(**1**)in CD2Cl2 (500 MHz, calibrated to residual CHDCl2 at 5.32 ppm)


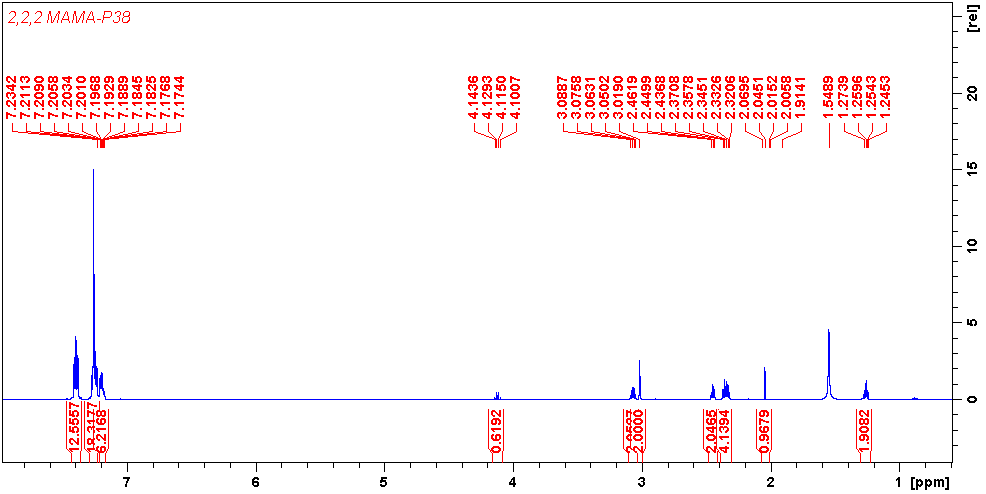


**Figure S2**. 1H NMR of N-(2-(tritylthio)ethyl)-2-((2-(tritylthio)ethyl)amino)acetamide **(2**) in CDCl3 (500 MHz, calibrated at 7.26 ppm)


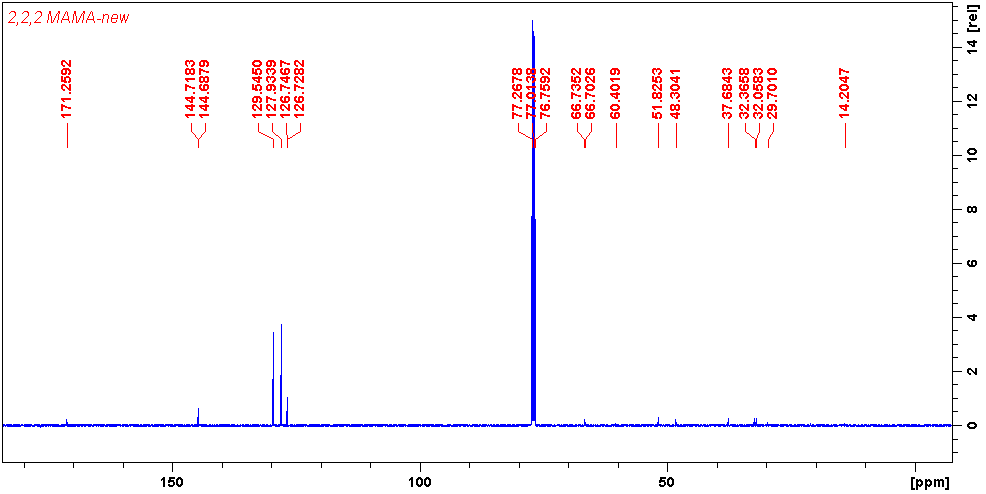


**Figure S3**. 13C NMR of N-(2-(tritylthio)ethyl)-2-((2-(tritylthio)ethyl)amino)acetamide(**2**) in CDCl3 (500 MHz, calibrated at 77.36 ppm)


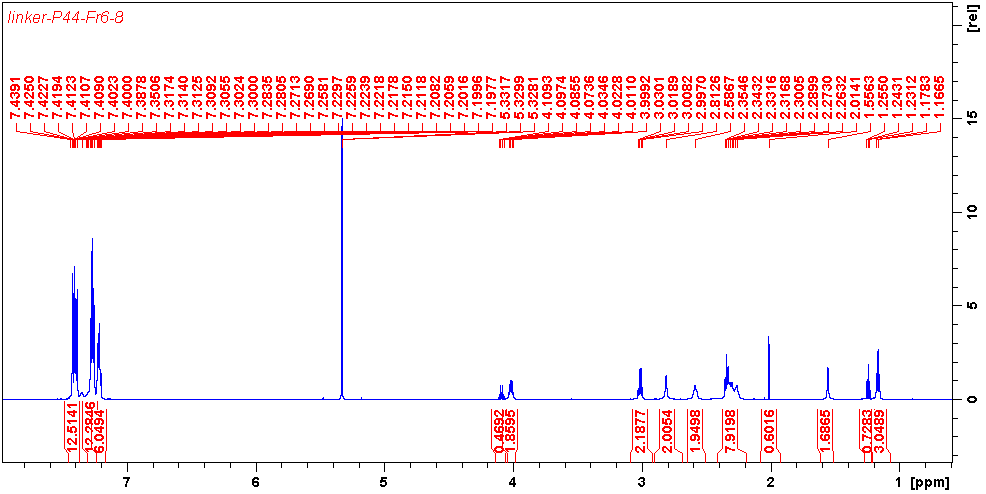


**Figure S4**. 1H NMR of ethyl 3-((2-oxo-2-((2-(tritylthio)ethyl)amino)ethyl)(2-(tritylthio)ethyl)amino)propionate [trityl protected 222-MAMA-*N*-ethylpropionate] (**3**)in CD2Cl2 **(**500 MHz calibrated at 5.35 ppm)


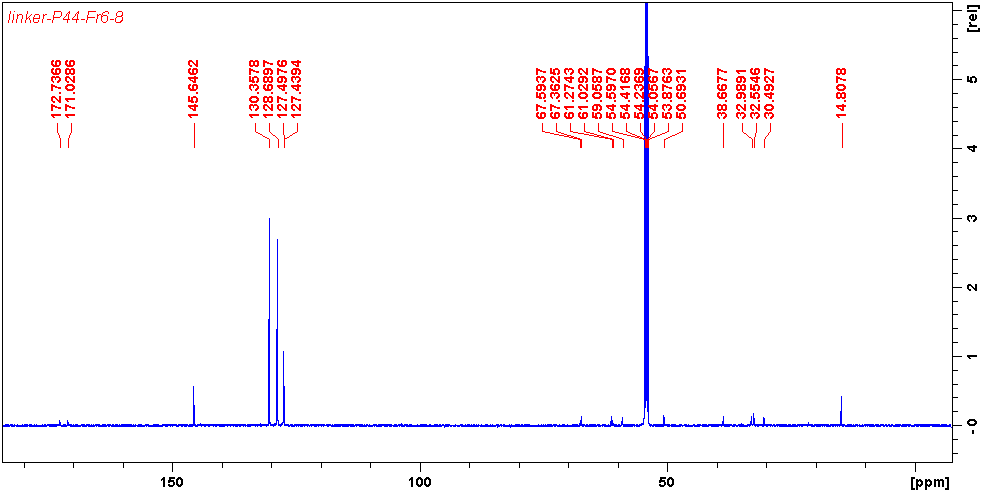


**Figure S5**. 13C NMR of ethyl 3-((2-oxo-2-((2-(tritylthio)ethyl)amino)ethyl)(2-(tritylthio)ethyl)amino)propionate [trityl protected 222-MAMA-*N*-ethylpropionate](**3**)in CD2Cl2 (500 MHz calibrated at 53.5 ppm)


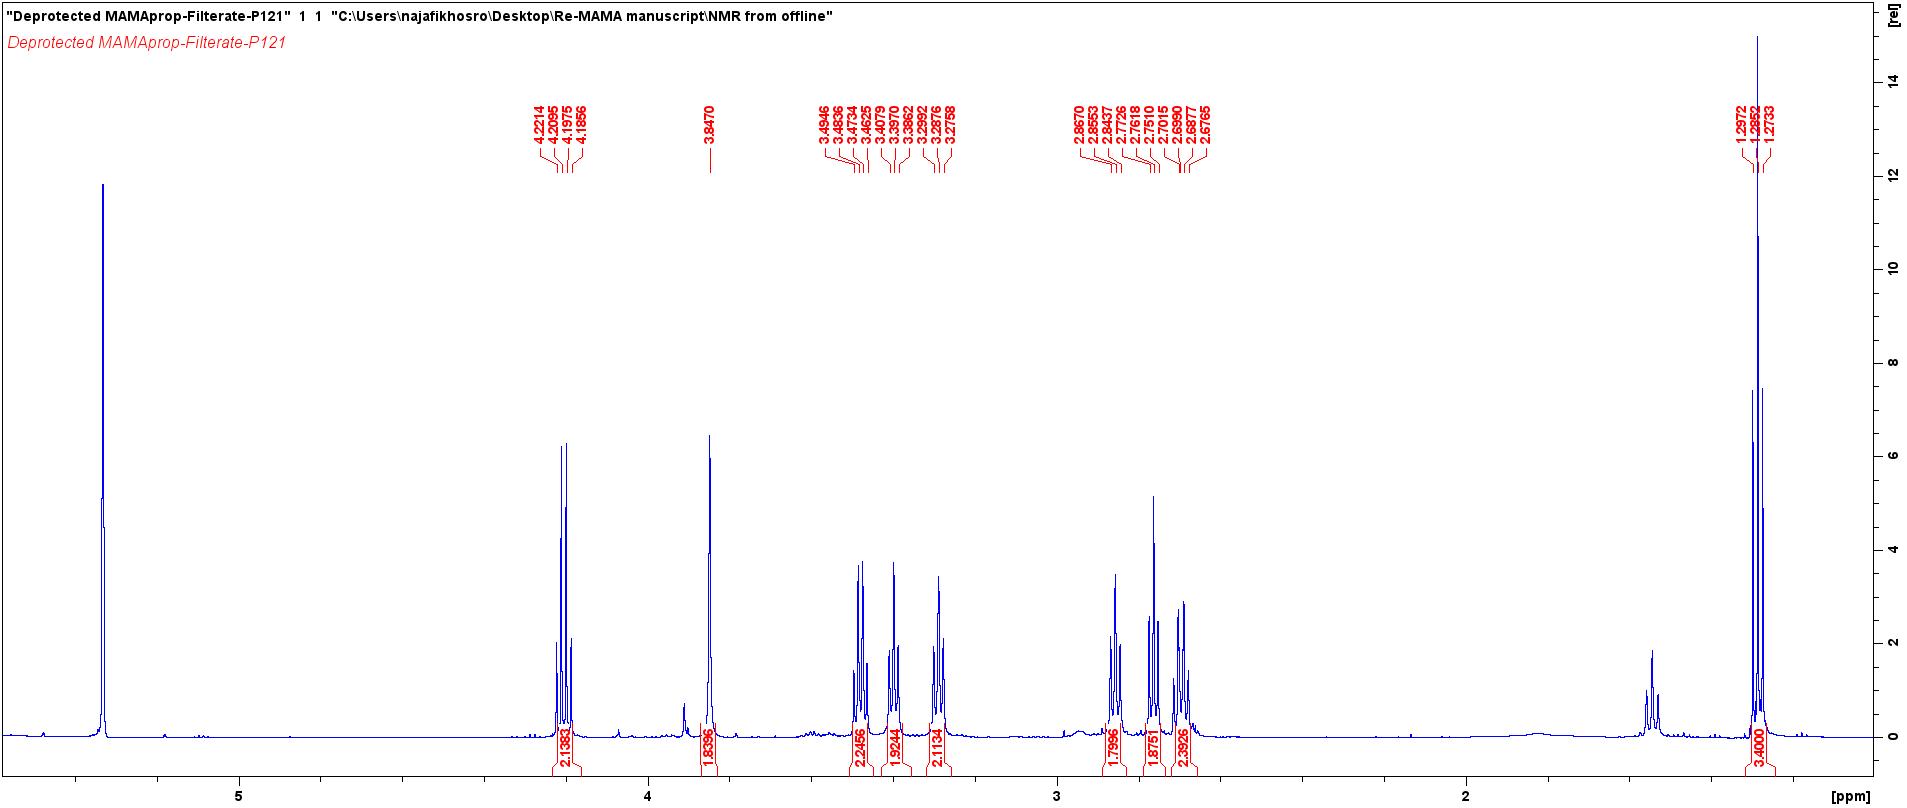


**Figure S6**.1H NMR of ethyl 3-((2-mercaptoethyl)(2-((2-mercaptoethyl)amino)-2-oxoethyl)amino)propionate (**4**) in CD2Cl3 (600 MHz calibrated at 5.32 ppm)


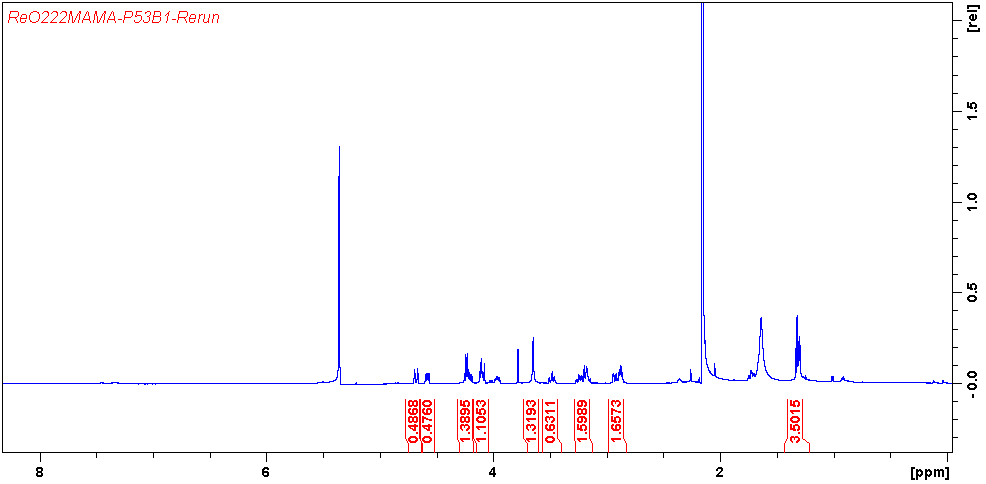


**Figure S7**.1H NMR of natReO(222-MAMA(N-ethylpropionate) (**5**) in CD2Cl2 (600 MHz calibrated at 5.32 ppm)


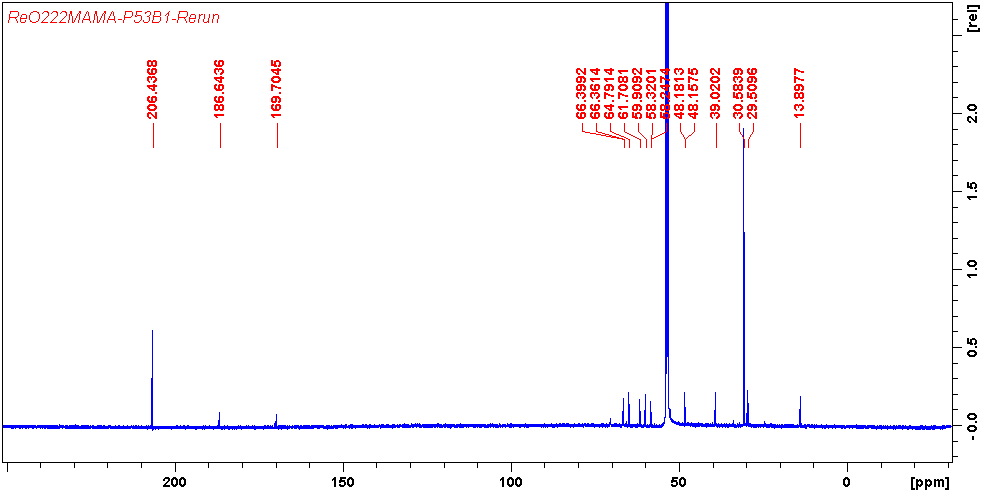


**Figure S8**.13C NMR ofnatReO(222-MAMA(N-ethylproprionate) (**5**) in CD2Cl2 (600 MHz calibrated at 53.5 ppm)


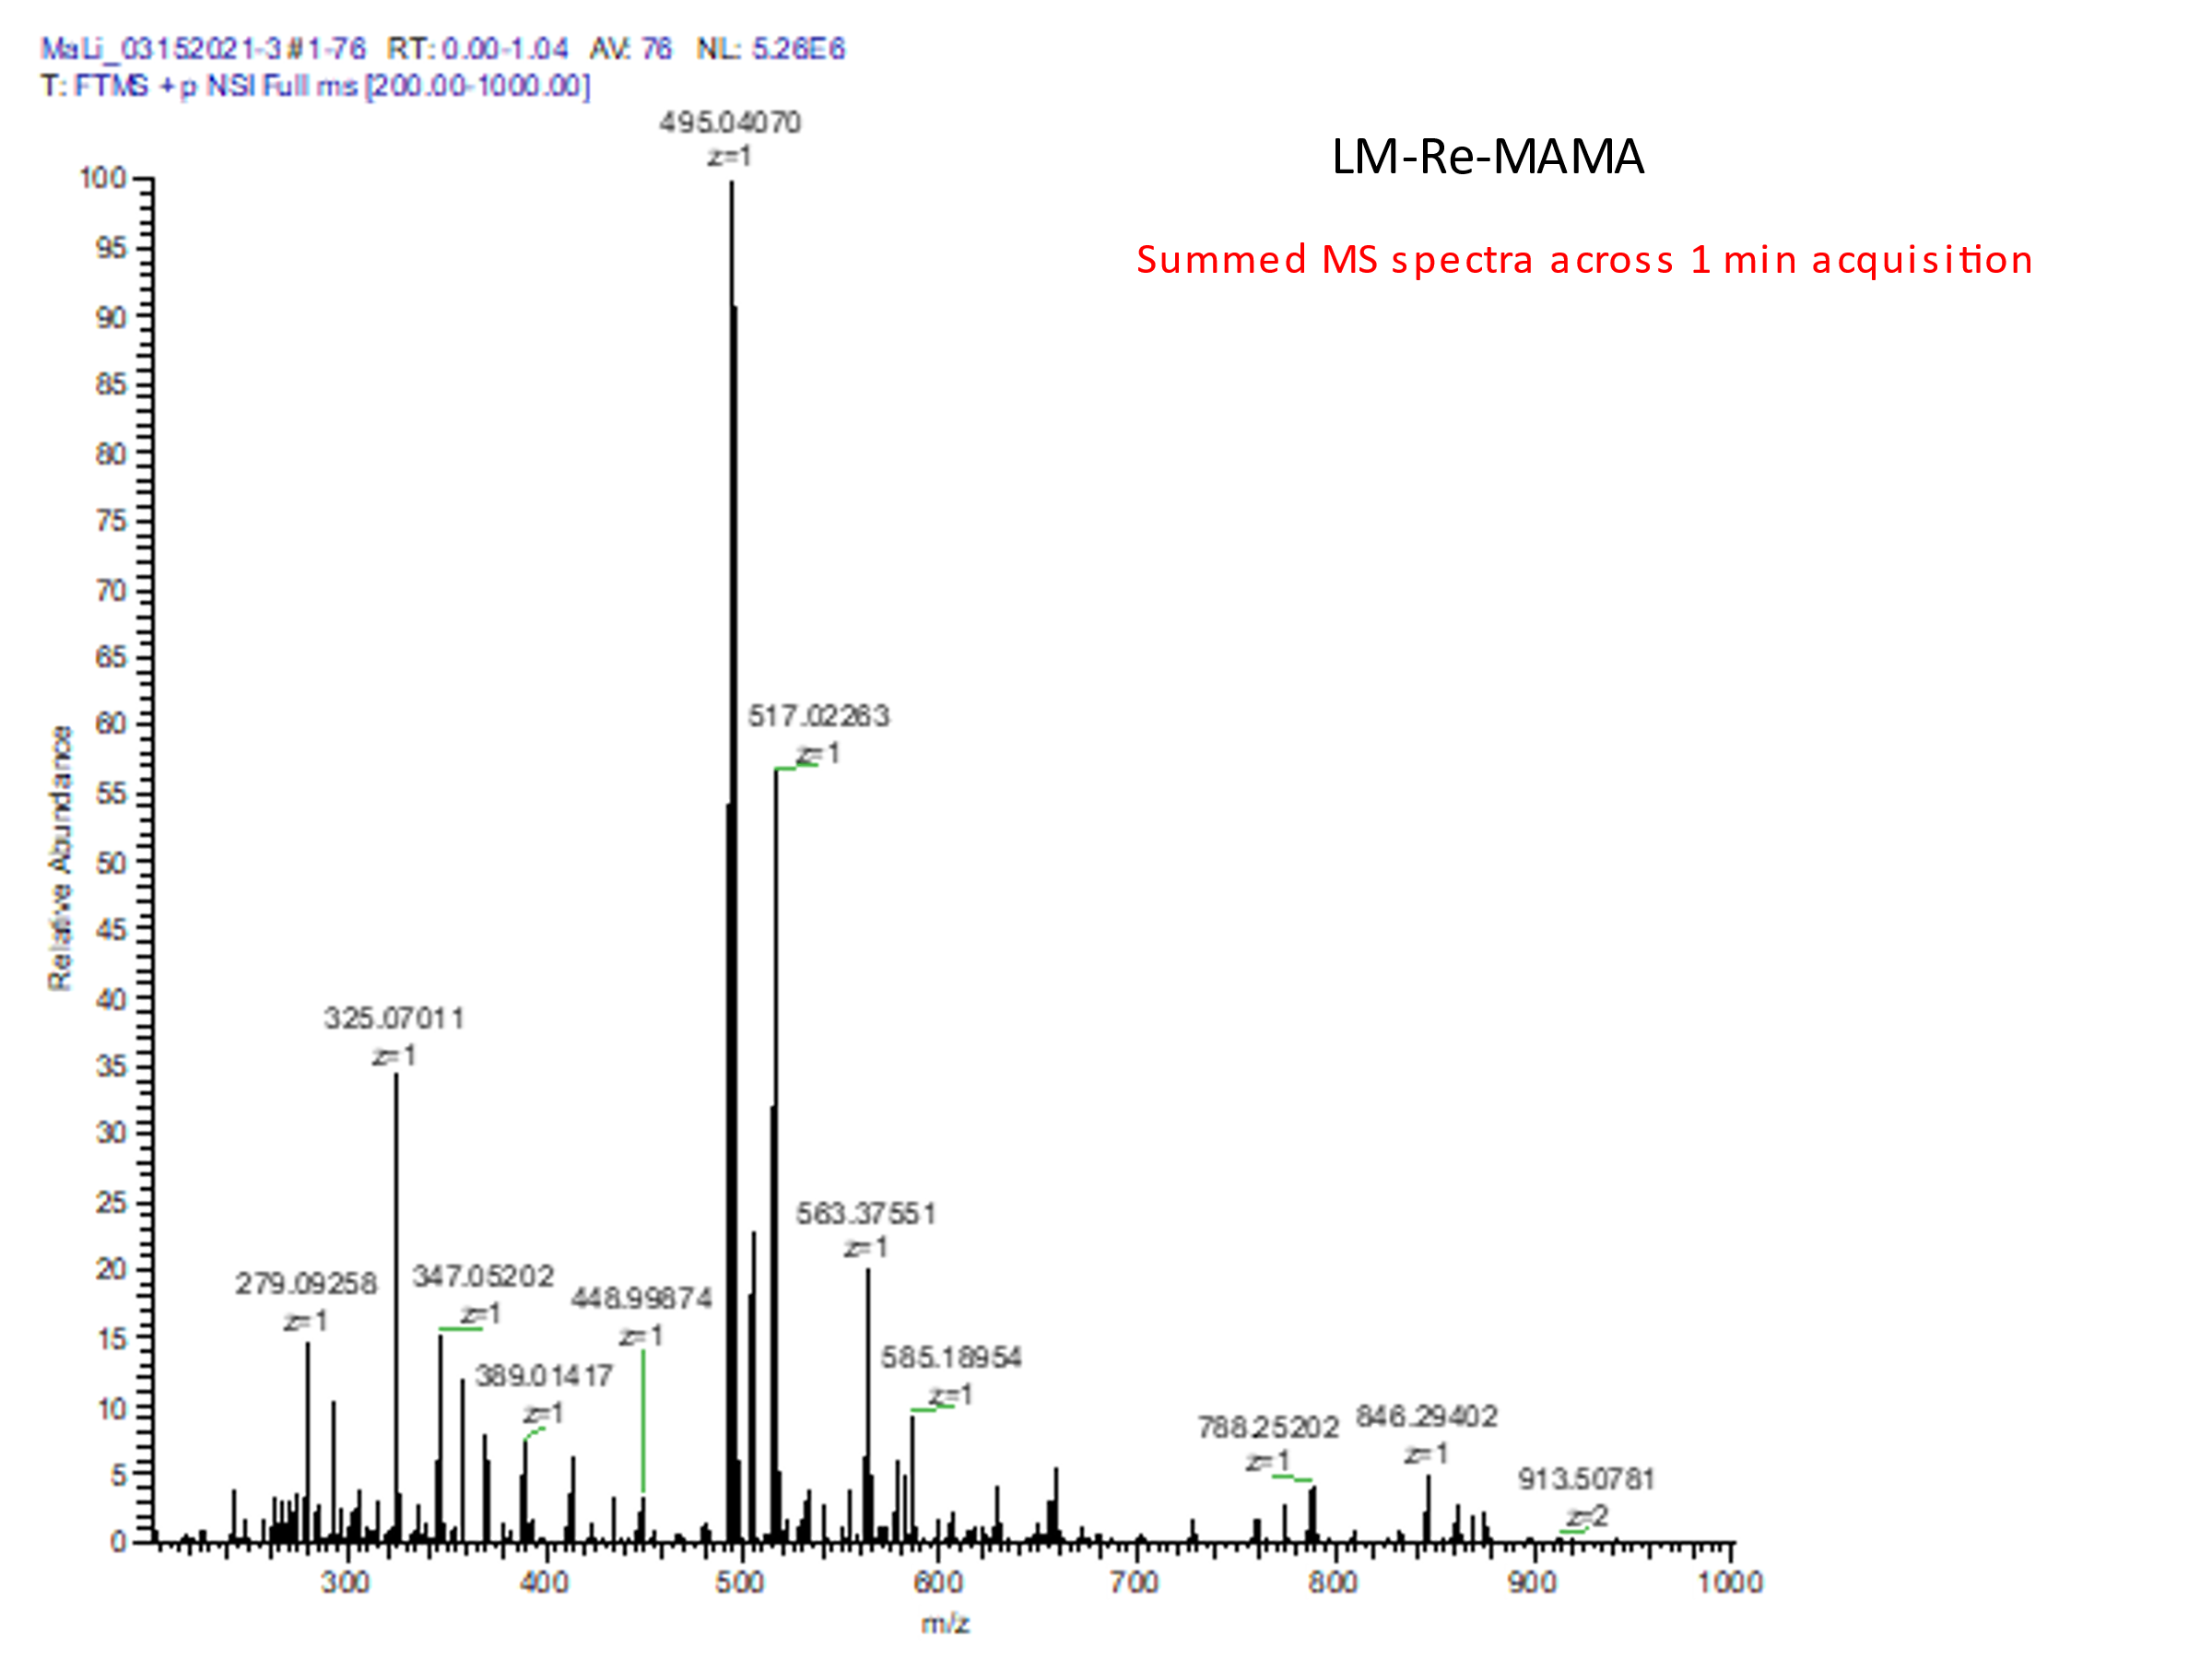


Observed mass [M+H]+: 495.04070

Theoretical mass [M+H]+: 495.04165

Mass error: 2ppm

Observed mass [M+Na]+: 517.02263

Theoretical mass [M+Na]+: 517.02360

Mass error: 2ppm

**Figure S9**. ESI-HR-MS of ReO(222-MAMA-*N*-ethylpropionate) (**5**)

**Figure S10**. Drawing of aluminum target backing used to contain graphite sandwiched 186WS2 for cyclotron irradiations.


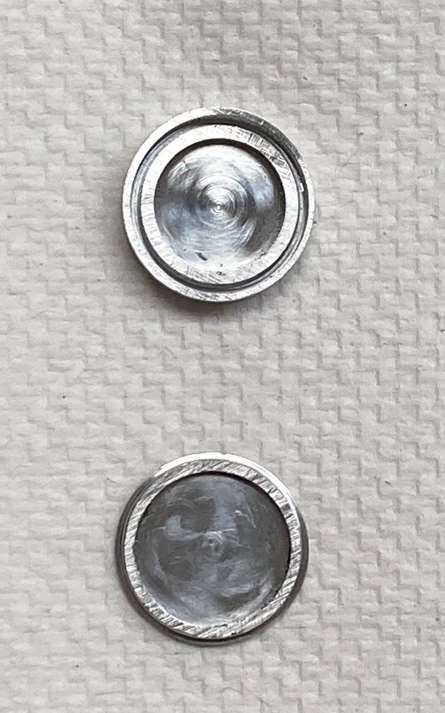


**Figure S11**. Photograph of aluminum target backing used to contain graphite sandwiched 186WS2 for cyclotron irradiations.


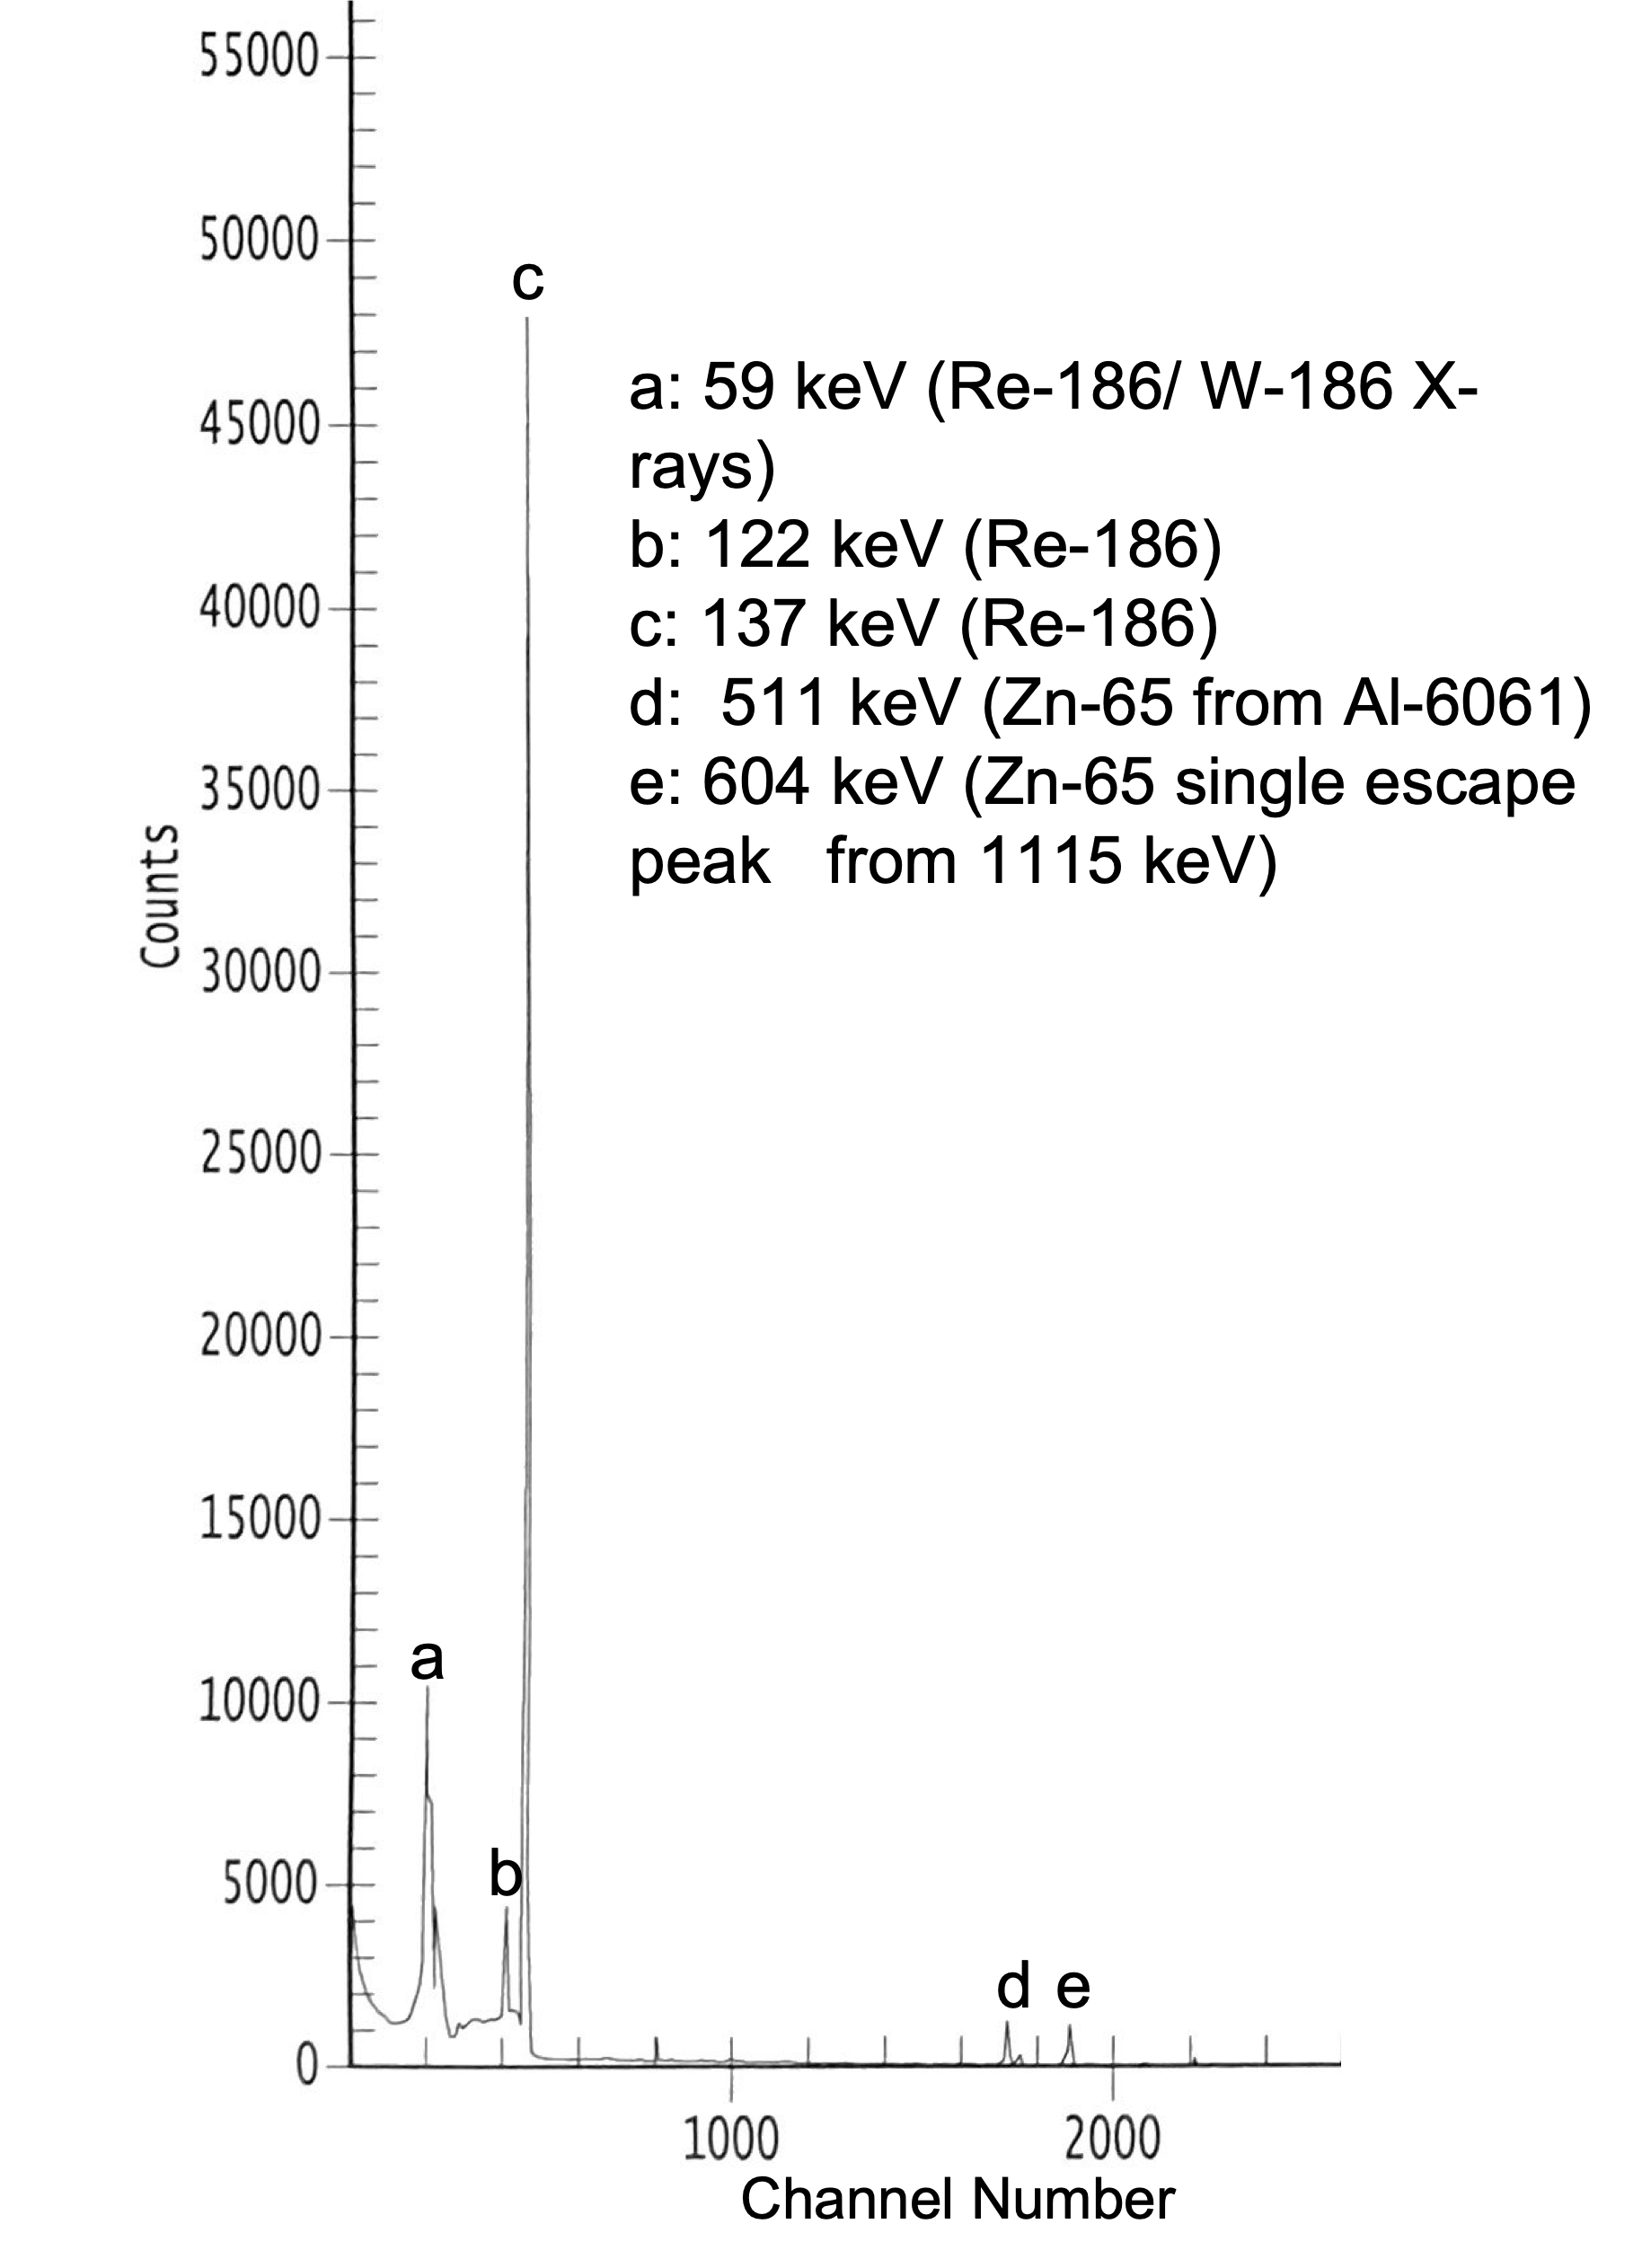


**Figure S12**: HPGe spectrum of dissolved target aliquot before purification


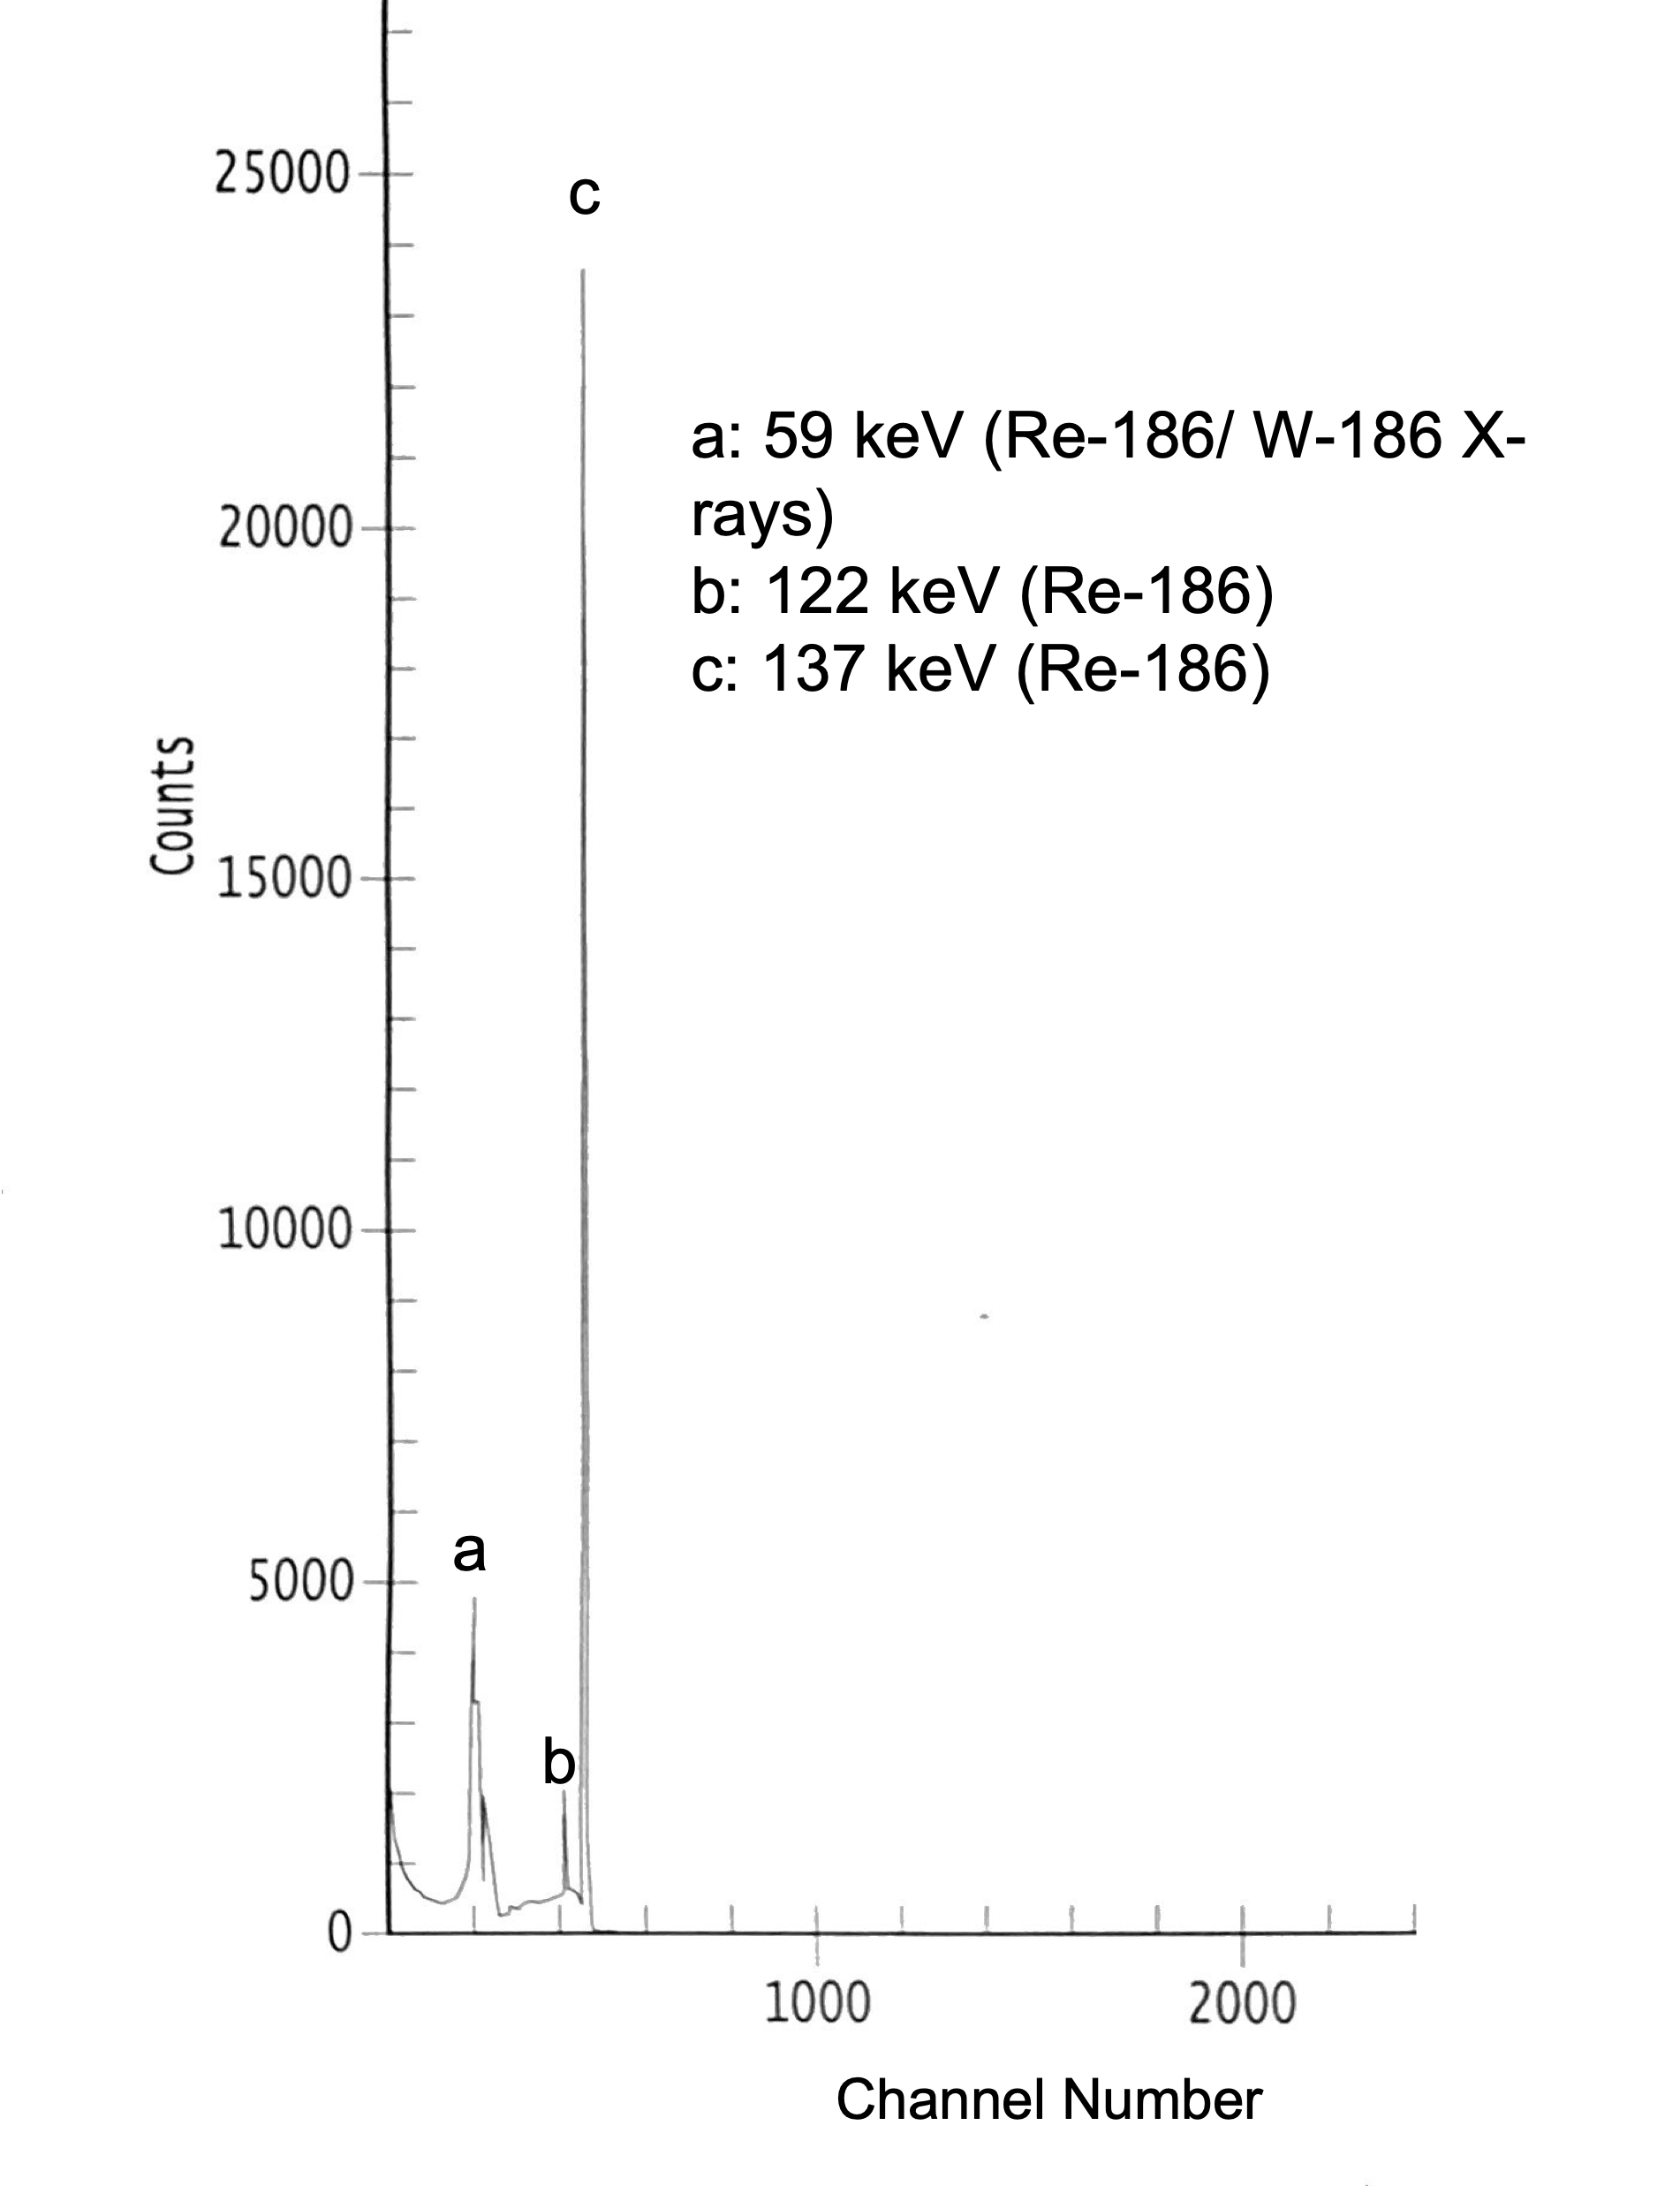


**Figure S13**. HPGe spectrum of purified 186Re aliquot

**Table S1**. ICP-MS results (ppm or mg/g material) for the purchased 186WO3, the synthesized 186WS2, the recovered 186W, and the separated 186Re

| **Sample** | **Origin** |  | **Atom %** | | | | |
| --- | --- | --- | --- | --- | --- | --- | --- |
|  |  | **Re** | **180W** | **182W** | **183W** | **184W** | **186W** |
| 186WO3 | Isoflex | 13.1 | 1 x 10-7 | 0.000210 | 0.000135 | 0.000133 | 0.9983 |
| 186WS2 | Synthesized | 10.7 | 6 x 10-7 | 0.000206 | 0.000139 | 0.000132 | 0.9983 |
| 186W | Recovered | <LOD | 3.2 x 10-7 | 0.00037 | 0.00022 | 0.000153 | 0.99788 |
|  | | | | | | | |
|  |  | **Re** | **W total** |  |  |  |  |
| 186Re | Isolated | 0.0324 | 0.2089 |  |  |  |  |
